# Supplementary material
Source: PubMed Central journal article supplement (PMC5754778)
Supplement: pnas.201711613SI.pdf [file pnas.201711613SI.pdf]

# Supporting Information

Rivera-Mulia et al. 10.1073/pnas.1711613114

## SI Materials and Methods

**Cell Culture.** Primary cells were obtained from Coriell Institute for Medical Research, from the Progeria Research Foundation, and from donors from the CHRU Montpellier cohort (Table S1). Human primary fibroblasts were maintained in DMEM (Invitrogen) containing 10% heat-inactivated FBS (PAA), 2 mM L-glutamine, and 1% penicillin and streptomycin (Invitrogen). hESCs and iPSCs were maintained as feeder-free cultures on Matrigel (BD Biosciences) with chemically defined mTeSR medium (STEMCELL Technologies), as previously described (1).

**Reprogramming into iPSCs.** Primary fibroblasts were reprogrammed to iPSCs by infection with either lentiviral or Sendai viral vectors containing reprogramming factors: OCT4, SOX2, KLF4, and C-MYC. Vectors were obtained from Addgene (2). The 293T cell line (Invitrogen) was used to produce transgene-expressing lentiviruses. Human primary fibroblasts were incubated overnight with equal amounts of supernatants containing each virus. Six days after transduction, cells were harvested and replated on a feeder layer. The next day, the medium was replaced with hESC medium supplemented with 10 ng/mL basic fibroblast growth factor (bFGF). The medium was changed every other day. Thirty-four days after transduction, colonies were picked and transferred onto a feeder layer with 2 mL of hESC medium supplemented with 10 ng/mL bFGF in 35-mm dishes.

**Redifferentiation of iPSCs.** iPSCs were differentiated as previously described as embryoid bodies in AggreWell EB Formation Medium (STEMCELL Technologies) supplemented with 0.3 mM ascorbic acid (Sigma-Aldrich), 10 ng/mL TGF $\beta$ 2 (R&D Systems), and ITS Supplement-A (Invitrogen). Embryoid bodies were attached to a gelatin-coated dish and were cultured for 10 d in DMEM (with high glucose) (Invitrogen) supplemented with ascorbic acid and 20% FBS. Cells that grew out from embryoid bodies were passaged and cultured every week to obtain consistent spindle-shaped cells.

**Immunofluorescence.** Cells were grown in coverslips, fixed with 4% paraformaldehyde, and permeabilized (PBS/0.5% Triton-X 100). Immunodetection was performed by 1-h incubation in blocking buffer (PBS/0.05% Tween-20, 5% BSA), followed by incubation with the primary antibodies mouse anti-H2AX (MA1-2022; Thermo Fisher) and goat anti-lamin B (sc-6217; Santa Cruz) for 1 h, two washes in PBS/0.5% Tween-20, 1 h of incubation with secondary antibodies (donkey anti-mouse Alexa-Fluor 488; donkey anti-mouse Alexa-Fluor 568; and donkey anti-goat Alexa-Fluor 647) (Invitrogen), and DNA was labeled by DAPI staining.

Images were collected using a DeltaVision microscope (Applied Precision) equipped with a CoolSNAP HQ camera (Roper Scientific). 3D images were captured at different stage positions and were processed using deconvolution software (softWoRx 3.5.0; Applied Precision).

**Genome-Wide RT Profiling.** Genome-wide RT profiles were constructed as previously described (3, 4). Briefly, cells were pulse labeled with BrdU, separated into early and late S-phase fractions by flow cytometry, and processed by either Repli-ChIP or Repli-seq. For Repli-ChIP, BrdU-substituted DNA from early and late S-phase populations was immunoprecipitated, differentially labeled, and cohybridized to a whole-genome oligonucleotide microarray. Microarray hybridization and data extraction were performed according to standard NimbleGen procedures. For Repli-seq, sequencing libraries of BrdU-substituted DNA from early and late fractions were prepared by NEBNext Ultra DNA Library Prep Kit for Illumina (E7370; New England Biolabs). Sequencing was performed on an Illumina-HiSeq 2500 sequencing system by 50-bp single-end reads. Reads with quality scores above 30 were mapped to the Hg19 reference genome using bowtie2. Approximately 8 million uniquely mapped reads were obtained from each library. Read counts were binned into 5-kb nonoverlapping windows, and log<sub>2</sub> ratios of read-counts between early and late fractions were calculated.

**Clustering Analysis.** RT profiles were expressed as numeric vectors. Nonoverlapping and variable regions (200-kb windows) were defined as those with differences  $\geq 1$  in pairwise comparisons between all samples (Fig. 2A). Unsupervised hierarchical and *k*-means clustering analysis were performed using Cluster 3.0 (5). Heatmaps and dendrograms were generated in Java TreeView (6). GO analysis was performed with the GREAT Tool (7). Branches of the dendrogram were constructed based on the correlation values (distance = 1 – correlation value).

**qRT-PCR.** Total RNA was extracted with RNeasy (Qiagen), according to the manufacturer's instructions. First-strand cDNA was synthesized with SuperScript III (Invitrogen). Isoform-specific primers were designed at exon junctions and optimized to have comparable efficiencies (Fig. S2C). All reactions were performed with FastStart SYBR Green Master (ROX) (Roche). qPCR reactions were tripled and performed in the ABI 7500 Fast system through 40 cycles (15 s at 95 °C, 45 s at 60 °C). CT values were generated by ABI software, and the relative gene expression was calculated by  $\Delta\Delta$ CT method using *HPRT1* gene as reference.

1. Ludwig TE, et al. (2006) Feeder-independent culture of human embryonic stem cells. *Nat Methods* 3:637–646.
2. Yu J, et al. (2007) Induced pluripotent stem cell lines derived from human somatic cells. *Science* 318:1917–1920.
3. Ryba T, Battaglia D, Pope BD, Hiratani I, Gilbert DM (2011) Genome-scale analysis of replication timing: From bench to bioinformatics. *Nat Protoc* 6:870–895.
4. Marchal C, et al. (2017) Repli-seq: Genome-wide analysis of replication timing by next-generation sequencing. *Nat Protoc*, in press.
5. de Hoon MJL, Imoto S, Nolan J, Miyano S (2004) Open source clustering software. *Bioinformatics* 20:1453–1454.
6. Saldanha AJ (2004) Java Treeview—Extensible visualization of microarray data. *Bioinformatics* 20:3246–3248.
7. McLean CY, et al. (2010) GREAT improves functional interpretation of cis-regulatory regions. *Nat Biotechnol* 28:495–501.



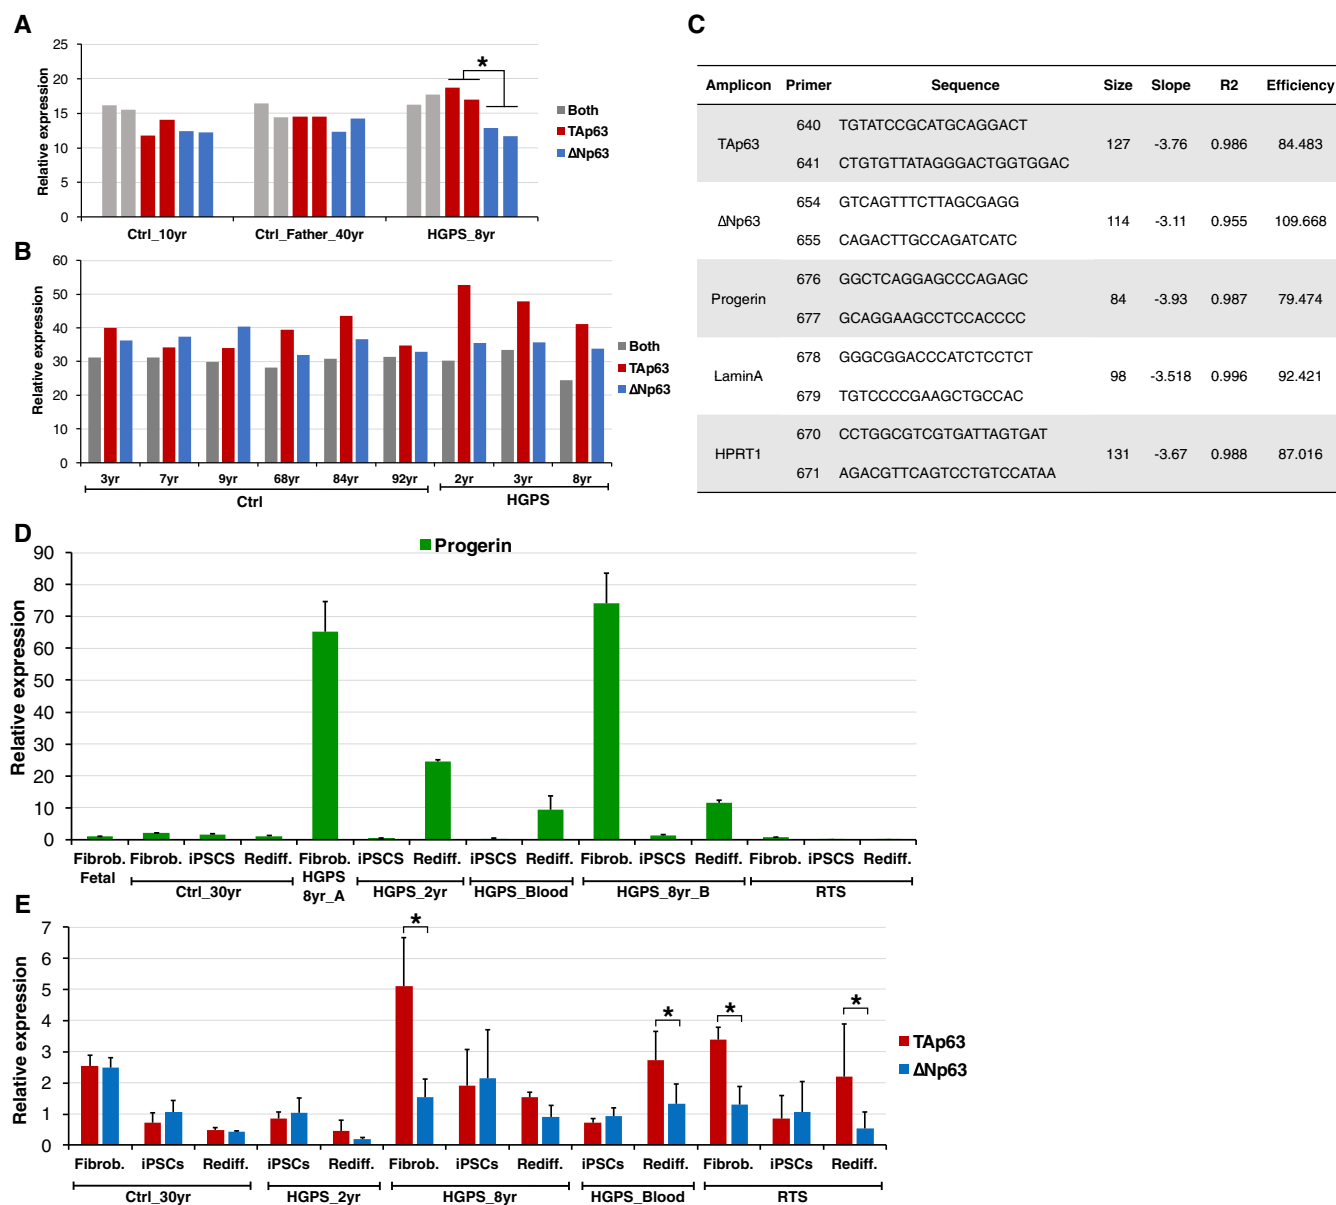

**Fig. S2.** Gene-expression analysis of HGPS and control samples. (A and B) A significant increase in TAp63 isoforms is observed in HGPS fibroblasts compared with healthy donors of distinct ages. Data were derived from array expression analysis of normal and HGPS cells by analyzing isoform-specific array probes against *TP63*. No significant differences were observed for probes that hybridize to both isoforms. Significant differences are shown ( $*P < 0.05$ ). Data in A were obtained from ref. 1, and data in B were obtained from ref. 2. (C) Specific amplicons and oligo sequences designed for qRT-PCR analysis of the expression of *TP63* isoforms, progerin, and lamin A. (D and E) Relative quantification of progerin (D) and *TP63* isoforms (E) in samples derived from donors of distinct ages with progeroid syndromes and controls (age 0–96 y), iPSCs, and redifferentiated cells. Expression analysis was performed by qRT-PCR analysis with specific amplicons against TAp63 and ΔNp63 isoforms. Relative expression was normalized against the *HPRT1* gene as an endogenous control and fetal fibroblasts as a calibrator sample. Relative values were calculated by the  $\Delta\Delta CT$  method ( $*P < 0.05$ ).

- McCord RP, et al. (2013) Correlated alterations in genome organization, histone methylation, and DNA-lamin A/C interactions in Hutchinson-Gilford progeria syndrome. *Genome Res* 23:260–269.
- Kubben N, et al. (2016) Repression of the antioxidant NRF2 pathway in premature aging. *Cell* 165:1361–1374.

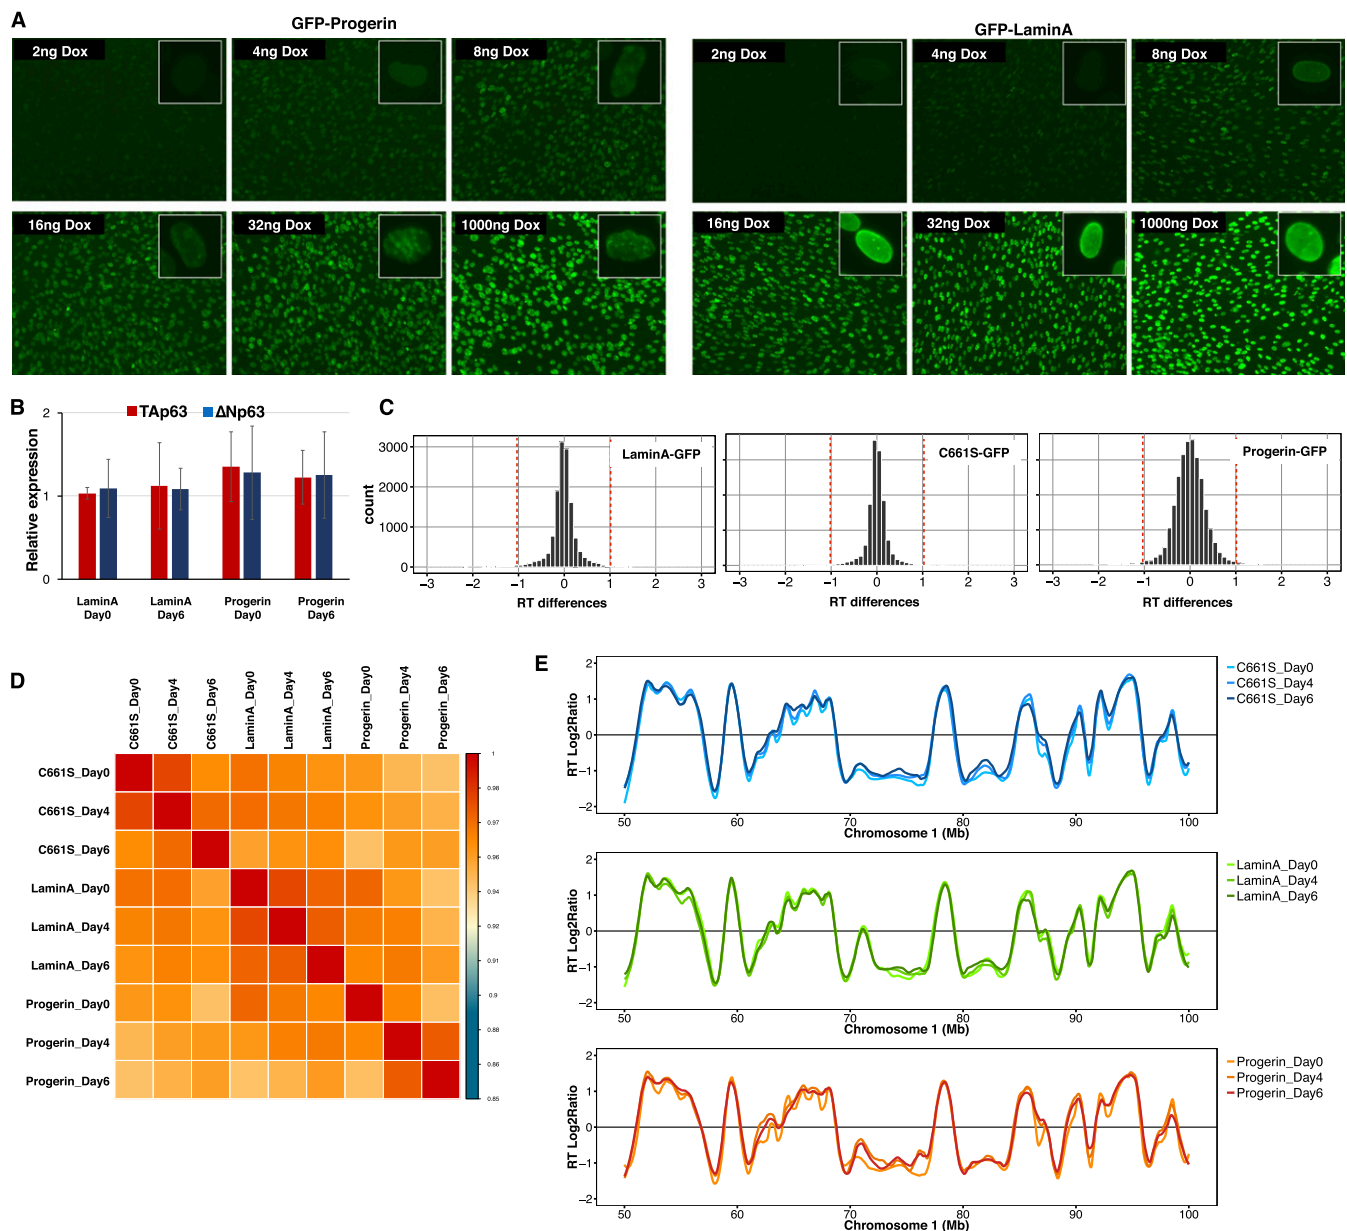

**Fig. S3.** Overexpression of progerin in normal fibroblasts recapitulates the nuclear alterations of HGPS. (A) Normal fibroblasts targeted with GFP-tagged lamin A or progerin or C661S (engineered farnesylation-defective progerin) vectors were induced with distinct concentrations of doxycycline (DOX). The optimal concentration of doxycycline DOX was determined to induce comparable levels of GFP fluorescence. (Magnification: 10 $\times$ ; Insets, 40 $\times$ .) (B) Relative expression levels of TAp63 and  $\Delta$ Np63 after overexpression of lamin A-GFP or progerin-GFP for 6 d. (C) RT differences after induction of lamin A-GFP, C661S-GFP, or progerin-GFP for 6 d. (D) Genome-wide correlation matrix of RT programs of fibroblasts at distinct days after induction of lamin A-GFP, C661S-GFP, or progerin-GFP. (E) RT profiles of an exemplary genomic region at chromosome 1 show identical RT after induction of lamin A-GFP, C661S-GFP, or progerin-GFP.





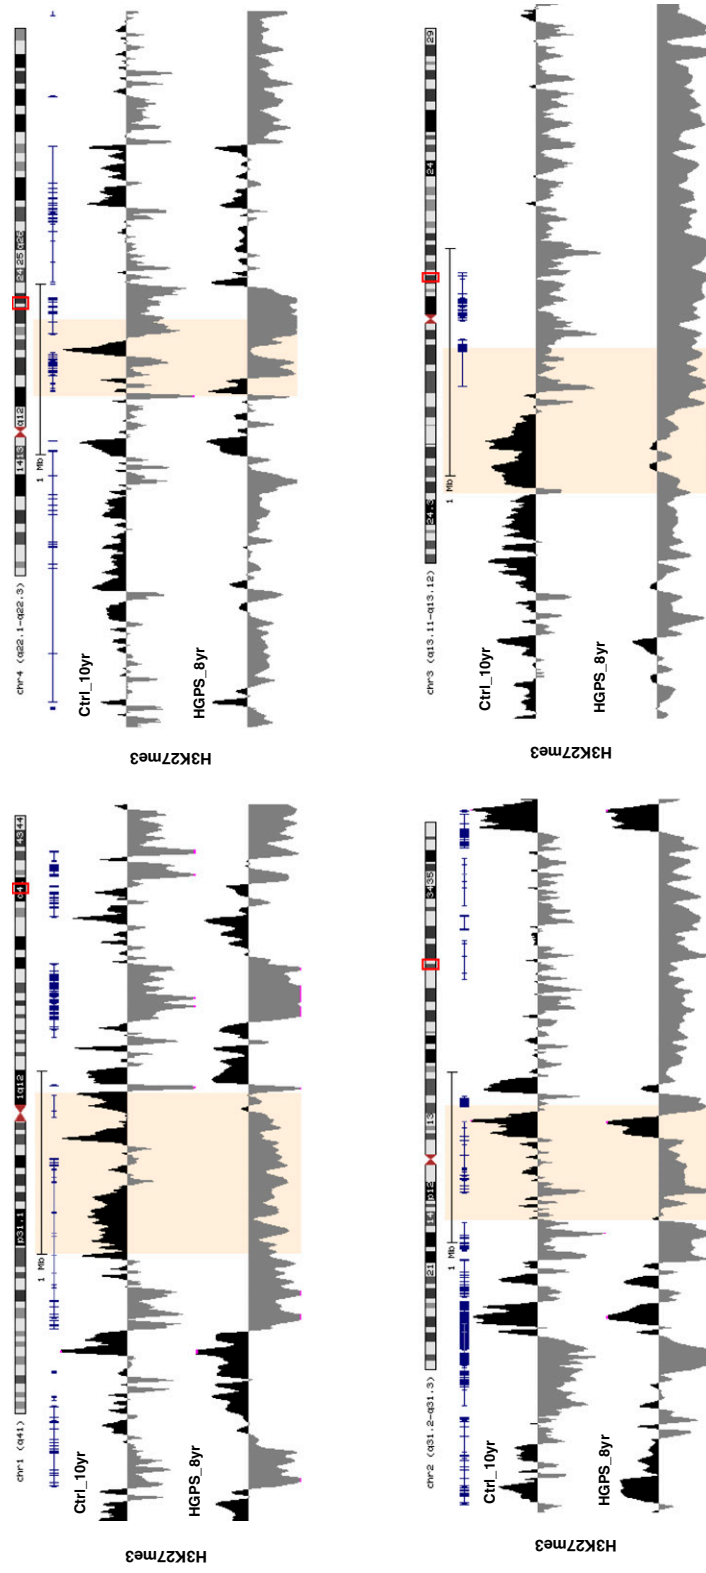

Fig. S6. Loss of H3K27me3 at the genomic regions from the progeroid patient (cell line HGADF167 = HGPS\_8yr) and from a healthy donor of similar age are shown for exemplary regions from the progeroid-specific RT signature. H3K27me3 datasets were obtained from ref. 1.

1. McCord RP, et al. (2013) Correlated alterations in genome organization, histone methylation, and DNA-lamin A/C interactions in Hutchinson-Gilford progeria syndrome. *Genome Res* 23:260–269.

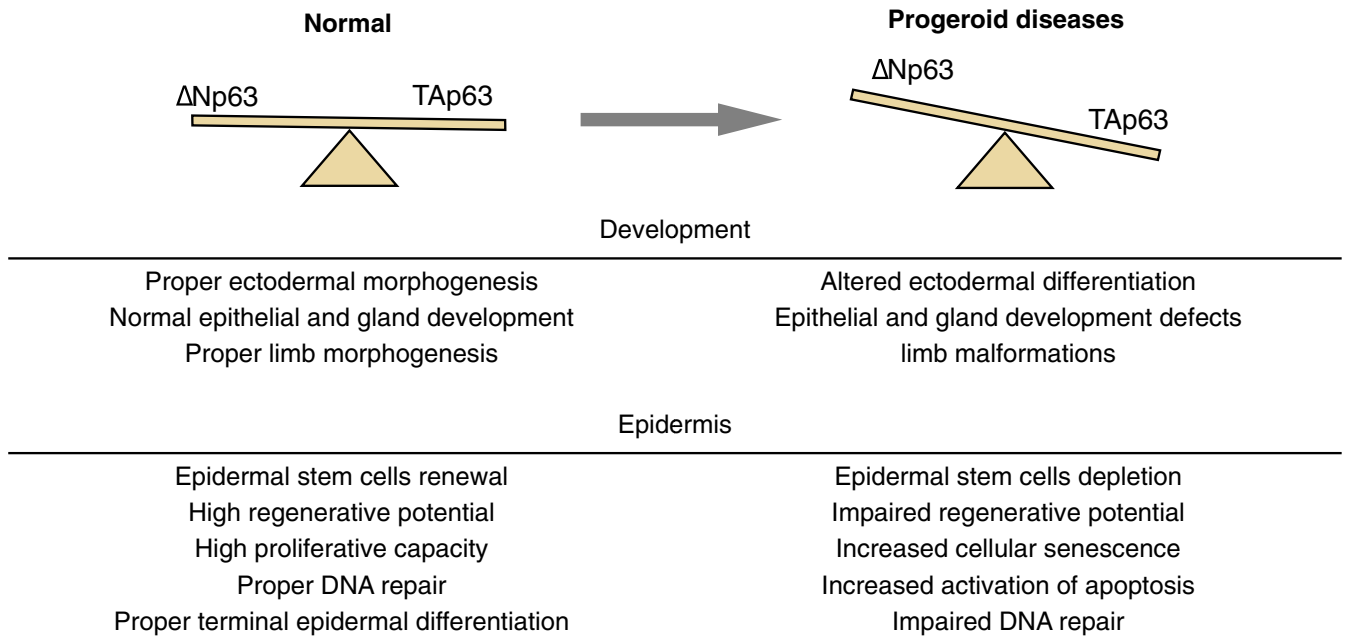

**Fig. S7.** Model of *TP63* alterations in progeroid diseases. Altered expression of *TP63* isoforms is associated with distinct defects in ectodermal development and epidermis regulation.







## Other Supporting Information Files

[Dataset S1 \(XLSX\)](#)
